# Supplementary material for: Neutrophil-to-Lymphocyte, Platelet-to-Lymphocyte Ratios, and Systemic Immune-Inflammation Index as Potential Biomarkers of Chronic Inflammation in Patients with Newly Diagnosed Acromegaly: A Single-Centre Study
Source: MDPI journal article supplement (doi:10.3390/jcm10173997), 2021-09-03
Supplement: s1 [file s1]

**Table S1.** Baseline characteristics of patients with acromegaly according to treatment methods.

| Variables                                                             | SSA therapy<br><i>n</i> = 20 | Surgery<br><i>n</i> = 38                | <i>p</i> -Value      |
|-----------------------------------------------------------------------|------------------------------|-----------------------------------------|----------------------|
| Age [years]                                                           | 60 (54–67)                   | 53 (41 – 60)                            | 0.026 * <sup>1</sup> |
| Female, <i>n</i> (%)                                                  | 16 (80)                      | 23 (60.5)                               | 0.154 <sup>2</sup>   |
| Male, <i>n</i> (%)                                                    | 4 (20)                       | 15 (39.5)                               |                      |
| BMI [kg/m <sup>2</sup> ]                                              | 33.3 (27.2 – 35.5)           | 29.0 (26.5 – 33.5)                      | 0.127 <sup>1</sup>   |
| Random GH at diagnosis [ng/mL]                                        | 4.61 (2.31 – 9.41)           | 11.65 (3.80 – 25.10)                    | 0.032 * <sup>1</sup> |
| IGF-1 at diagnosis [ng/mL]                                            | 534.50 (380.95 – 759.50)     | 675.0 (565.0 – 900.0)                   | 0.087 <sup>1</sup>   |
| IGF-1, x ULN at diagnosis                                             | 3.49 (1.93 – 4.12)           | 3.41 (2.48 – 4.60)                      | 0.213 <sup>1</sup>   |
| Lanreotide Autogel, <i>n</i> (%)                                      | 9 (45)                       | -                                       | -                    |
| Octreotide LAR, <i>n</i> (%)                                          | 9 (45)                       | -                                       | -                    |
| Switching SSA therapy                                                 | 2 (10)                       | -                                       | -                    |
| Median follow-up [months]                                             | 10.0 (2.3 – 17.8)            | 8.8 (7.3 – 10.8)<br>2.8 (2.0 – 4.8) *** | 0.852 <sup>1</sup>   |
| Pituitary adenoma mass effects                                        |                              |                                         |                      |
| Visual field defects, <i>n</i> (%)                                    | 5 (25)                       | 3 (7.9)                                 | 0.077 <sup>1</sup>   |
| Headache, <i>n</i> (%)                                                | 10 (50)                      | 21 (55.2)                               | 0.712 <sup>1</sup>   |
| Radiological features of pituitary adenomas                           |                              |                                         |                      |
| Primary tumour MD [mm]                                                | 12.5 (8.1 – 17.5)            | 14.5 (10.0 – 25.0)                      | 0.242 <sup>1</sup>   |
| Microadenoma, <i>n</i> (%)                                            | 6 (30)                       | 8 (21.1)                                | 0.383 <sup>1</sup>   |
| Macroadenoma, <i>n</i> (%)                                            | 14 (70)                      | 29 (76.3)                               | 0.307 <sup>1</sup>   |
| Giant tumour, <i>n</i> (%)                                            | 0 (0)                        | 1 (2.6)                                 | **                   |
| At least 1 feature of pituitary adenoma<br>invasiveness, <i>n</i> (%) | 8 (40)                       | 25 (65.8)                               | 0.063 <sup>1</sup>   |
| No features of pituitary adenoma invasiveness,<br><i>n</i> (%)        | 12 (60)                      | 13 (34.2)                               |                      |
| Sphenoid sinus invasion, <i>n</i> (%)                                 | 6 (30)                       | 22 (57.9)                               | 0.046 * <sup>1</sup> |
| Cavernous sinus invasion, <i>n</i> (%)                                | 3 (15)                       | 15 (39.5)                               | 0.059 <sup>1</sup>   |
| Compression of the optic chiasm, <i>n</i> (%)                         | 6 (30)                       | 11 (29.0)                               | 0.942 <sup>1</sup>   |
| Hormonal status of pituitary gland                                    |                              |                                         |                      |
| Secondary hypothyroidism, <i>n</i> (%)                                | 1 (5)                        | 0 (0.0)                                 | -                    |
| Secondary adrenal insufficiency, <i>n</i> (%)                         | 1 (5)                        | 1 (2.6)                                 | 0.660 <sup>1</sup>   |
| Hypogonadism hypogonadotropic/estrogen<br>depletion, <i>n</i> (%)     | 3 (15)                       | 5 (13.2)                                | 0.859 <sup>1</sup>   |
| Hyperprolactinemia due to pituitary stalk<br>deviation, <i>n</i> (%)  | 3 (15)                       | 9 (23.7)                                | 0.449 <sup>1</sup>   |
| At least 1 pituitary deficiency, <i>n</i> (%)                         | 3 (15)                       | 13 (34.2)                               | 0.126 <sup>1</sup>   |
| No pituitary deficiency, <i>n</i> (%)                                 | 17 (85)                      | 25 (65.8)                               |                      |
| Glucose homeostasis disorders                                         |                              |                                         |                      |
| Normoglycemia, <i>n</i> (%)                                           | 6 (30)                       | 11 (29.0)                               | 0.942 <sup>1</sup>   |
| Pre-DM, <i>n</i> (%)                                                  | 10 (50)                      | 19 (50.0)                               | 0.992 <sup>1</sup>   |
| IFG, <i>n</i> (%)                                                     | 7 (35)                       | 17 (44.7)                               | 0.484 <sup>1</sup>   |
| IGT, <i>n</i> (%)                                                     | 6 (30)                       | 6 (15.8)                                | 0.212 <sup>1</sup>   |
| IFG+IGT, <i>n</i> (%)                                                 | 3 (15)                       | 4 (10.5)                                | 0.632 <sup>1</sup>   |
| T2DM/secondary form of DM, <i>n</i> (%)                               | 4 (20)                       | 8 (21.1)                                | 0.935 <sup>1</sup>   |
| FPG [mg/dL]                                                           | 108.0 (95.5 – 118)           | 104.0 (93.0 – 114.0)                    | 0.529 <sup>1</sup>   |
| Cardiovascular complications                                          |                              |                                         |                      |
| Hypertension, <i>n</i> (%)                                            | 15 (75)                      | 24 (63.2)                               | 0.371 <sup>1</sup>   |
| Coronary artery disease, <i>n</i> (%)                                 | 3 (15)                       | 5 (13.2)                                | 0.859 <sup>1</sup>   |
| Cardiac arrhythmias, <i>n</i> (%)                                     | 6 (30)                       | 2 (5.3)                                 | 0.010 * <sup>1</sup> |
| Disturbances in TTE, <i>n</i> (%)                                     | 9 (45)                       | 21 (55.3)                               | 0.467 <sup>1</sup>   |
| Other comorbidities                                                   |                              |                                         |                      |
| Obstructive sleep apnea syndrome, <i>n</i> (%)                        | 3 (15)                       | 10 (26.3)                               | 0.336 <sup>1</sup>   |
| Benign neoplasms, <i>n</i> (%) <sup>a</sup>                           | 10 (50)                      | 16 (42.1)                               | 0.575 <sup>1</sup>   |
| Degenerative changes in joints and bones,<br><i>n</i> (%)             | 11 (55)                      | 13 (34.2)                               | 0.132 <sup>1</sup>   |

|                                                                                                                                                                                                                                                                                                                                                                                                                                                                                                                                                                                                                                                                                                                                                                                                                                                                                                      |        |          |                    |
|------------------------------------------------------------------------------------------------------------------------------------------------------------------------------------------------------------------------------------------------------------------------------------------------------------------------------------------------------------------------------------------------------------------------------------------------------------------------------------------------------------------------------------------------------------------------------------------------------------------------------------------------------------------------------------------------------------------------------------------------------------------------------------------------------------------------------------------------------------------------------------------------------|--------|----------|--------------------|
| Carpal tunnel syndrome, <i>n</i> (%)                                                                                                                                                                                                                                                                                                                                                                                                                                                                                                                                                                                                                                                                                                                                                                                                                                                                 | 6 (30) | 7 (18.4) | 0.325 <sup>1</sup> |
| Values are number (%) or median (interquartile range, IQR). * <i>p</i> -value < 0.05 was statistically significant. ** This variable was detected only in single case, thus the statistical analysis is impossible. *** Median time of assessment after surgery. <sup>1</sup> U-Mann-Whitney test and <sup>2</sup> Chi-Square test were applied. GH – growth hormone; IGF-1 – insulin-like growth factor 1; IGF-1 ULN – insulin-like growth factor 1 upper limit of normal range for age and sex; SSA – somatostatin analogue; MD – maximum diameter; FPG – fasting plasma glucose; IFG – impaired fasting glucose; IGT – impaired glucose tolerance; DM – diabetes mellitus; T2DM – diabetes mellitus type 2; TTE – trans-thoracic echocardiography. <sup>a</sup> Benign neoplasms were defined as the presence of colon polyps, polyp of the gallbladder, uterine fibroids, adrenal gland adenoma. |        |          |                    |

**Table S2.** Results of the model from the nparLD R package, testing for the effects of method of treatment (surgery, pharmacotherapy) and time (before treatment, after treatment).

| Factor                     | Statistic | df | <i>p</i> -Value |
|----------------------------|-----------|----|-----------------|
| <b>WBC</b>                 |           |    |                 |
| Method of treatment        | 0.219     | 1  | 0.640           |
| Time                       | 5.272     | 1  | 0.022 *         |
| Method of treatment x Time | 1.159     | 1  | 0.282           |
| <b>NEU</b>                 |           |    |                 |
| Method of treatment        | 0.053     | 1  | 0.817           |
| Time                       | 7.235     | 1  | 0.007 *         |
| Method of treatment x Time | 1.701     | 1  | 0.192           |
| <b>LYM</b>                 |           |    |                 |
| Method of treatment        | 0.442     | 1  | 0.506           |
| Time                       | 0.459     | 1  | 0.498           |
| Method of treatment x Time | 0.090     | 1  | 0.765           |
| <b>NLR</b>                 |           |    |                 |
| Method of treatment        | 0.139     | 1  | 0.709           |
| Time                       | 7.000     | 1  | 0.008 *         |
| Method of treatment x Time | 1.086     | 1  | 0.297           |
| <b>MONO</b>                |           |    |                 |
| Method of treatment        | 0.447     | 1  | 0.504           |
| Time                       | 2.023     | 1  | 0.155           |
| Method of treatment x Time | 0.918     | 1  | 0.338           |
| <b>LMR</b>                 |           |    |                 |
| Method of treatment        | 1.088     | 1  | 0.297           |
| Time                       | 1.017     | 1  | 0.313           |
| Method of treatment x Time | 0.115     | 1  | 0.735           |
| <b>PLT</b>                 |           |    |                 |
| Method of treatment        | 0.094     | 1  | 0.759           |
| Time                       | 0.371     | 1  | 0.542           |
| Method of treatment x Time | 2.419     | 1  | 0.120           |
| <b>PLR</b>                 |           |    |                 |
| Method of treatment        | 0.579     | 1  | 0.447           |
| Time                       | 0.503     | 1  | 0.478           |
| Method of treatment x Time | 0.914     | 1  | 0.339           |
| <b>MPV</b>                 |           |    |                 |
| Method of treatment        | 0.013     | 1  | 0.909           |
| Time                       | 1.636     | 1  | 0.201           |
| Method of treatment x Time | 0.015     | 1  | 0.902           |
| <b>MPV/PLT</b>             |           |    |                 |
| Method of treatment        | 0.103     | 1  | 0.749           |
| Time                       | 0.377     | 1  | 0.539           |
| Method of treatment x Time | 0.468     | 1  | 0.494           |
| <b>SII</b>                 |           |    |                 |
| Method of treatment        | 0.198     | 1  | 0.657           |
| Time                       | 6.240     | 1  | 0.012 *         |
| Method of treatment x Time | 1.454     | 1  | 0.228           |
| <b>GH</b>                  |           |    |                 |
| Method of treatment        | 0.924     | 1  | 0.034 *         |

|                            |         |   |           |
|----------------------------|---------|---|-----------|
| Time                       | 121.512 | 1 | < 0.001 * |
| Method of treatment x Time | 8.204   | 1 | 0.004 *   |
| <b>IGF-1</b>               |         |   |           |
| Method of treatment        | 1.238   | 1 | 0.027 *   |
| Time                       | 94.054  | 1 | < 0.001 * |
| Method of treatment x Time | 2.397   | 1 | 0.012 *   |
| <b>Adenoma MD</b>          |         |   |           |
| Method of treatment        | 4.048   | 1 | 0.042 *   |
| Time                       | 78.465  | 1 | < 0.001 * |
| Method of treatment x Time | 32.060  | 1 | < 0.001 * |

A total of 58 patients were enrolled in the analysis. \* *p*-value < 0.05 was statistically significant. WBC – white blood cell; NEU – neutrophil; LYM – lymphocyte; NLR – neutrophil-to-lymphocyte ratio; MONO – monocyte; LMR – lymphocyte-to-monocyte ratio; PLT – platelet; PLR – platelet-to-lymphocyte ratio; MPV – mean platelet volume; MPV/PLT – mean platelet volume-to-platelet ratio; SII – systemic immune-inflammation index; GH – growth hormone; IGF-1 – insulin-like growth factor – 1; MD – maximum diameter.
